# Supplementary material for: Functional hierarchy among different Rab27 effectors involved in secretory granule exocytosis
Source: eLife journal article supplement (doi:10.7554/elife.82821), 2023-02-21

# Source data 2

## Uncropped blot images of Figure 3A

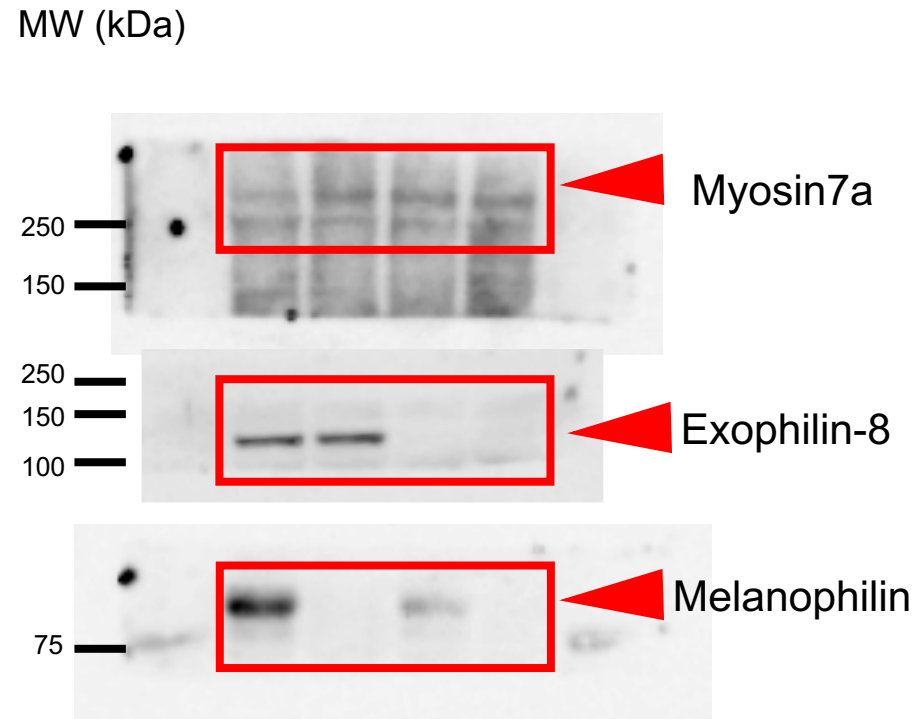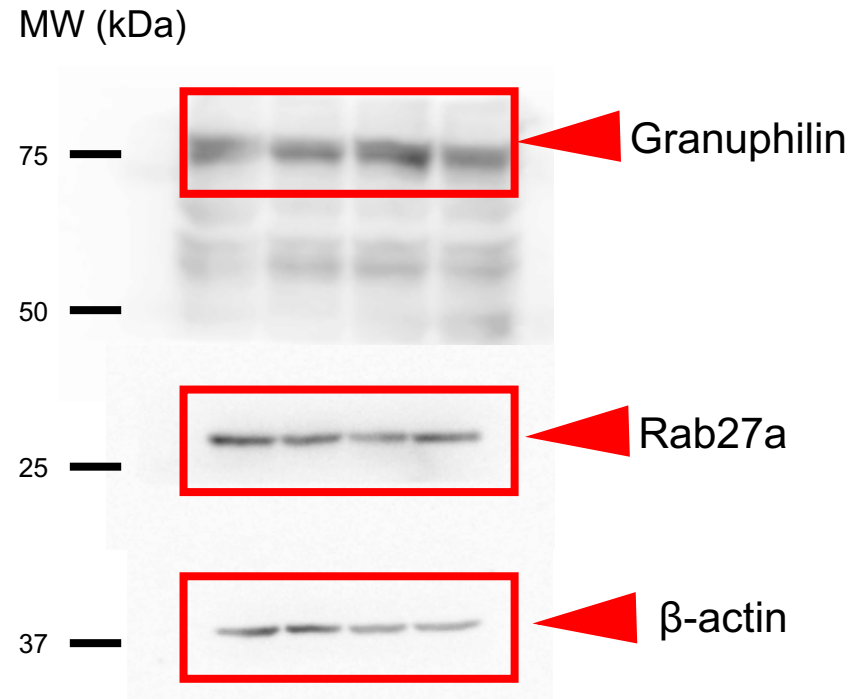

# Source data 2

## Uncropped blot images of Figure 3B

MW (kDa)

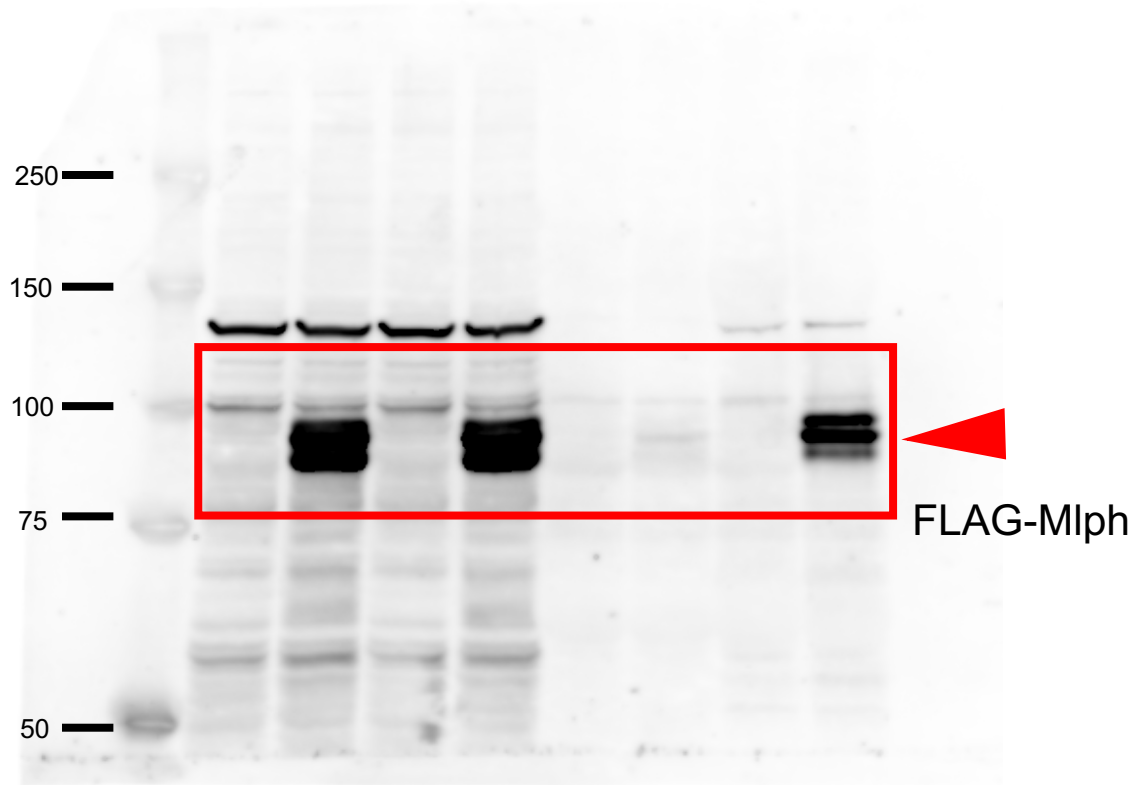

MW (kDa)

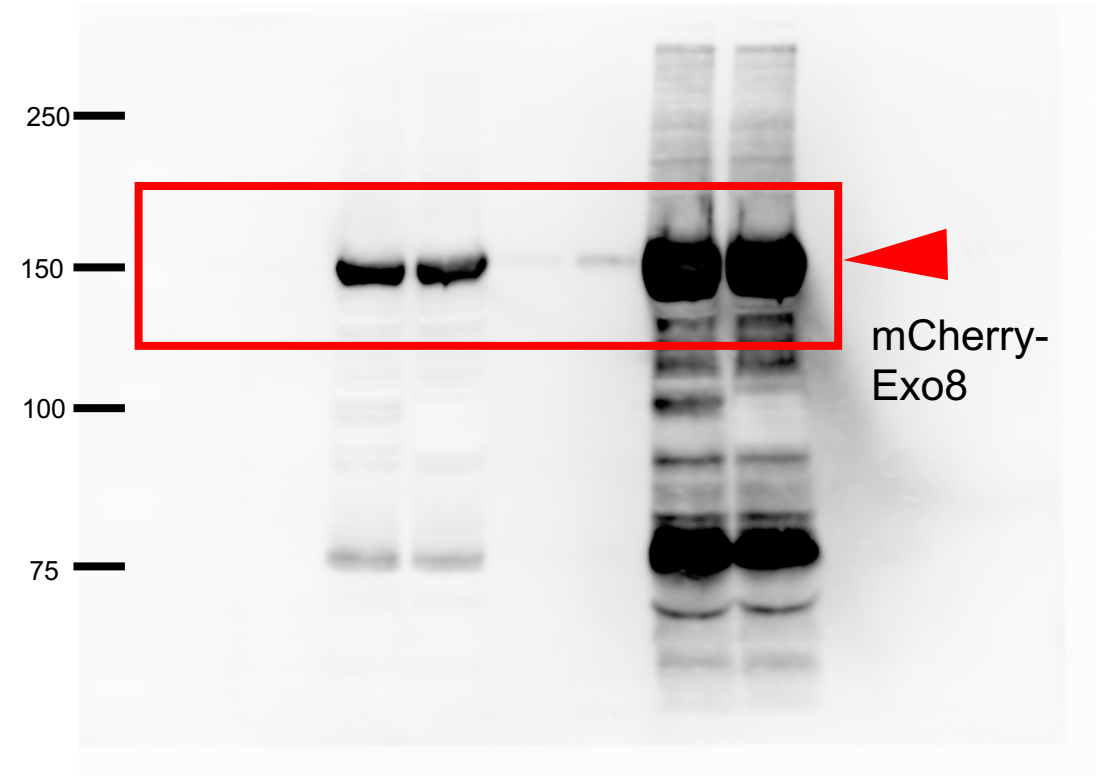

# Source data 2

## Uncropped blot images of Figure 3C

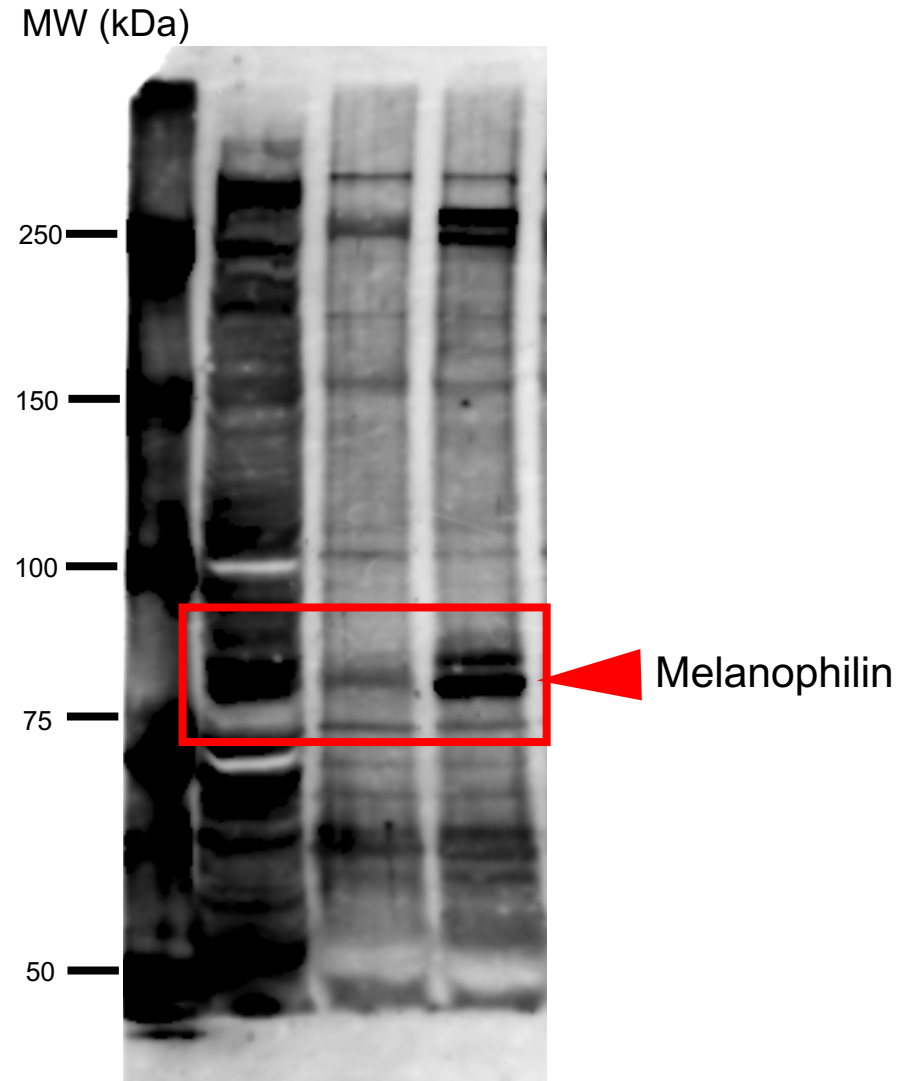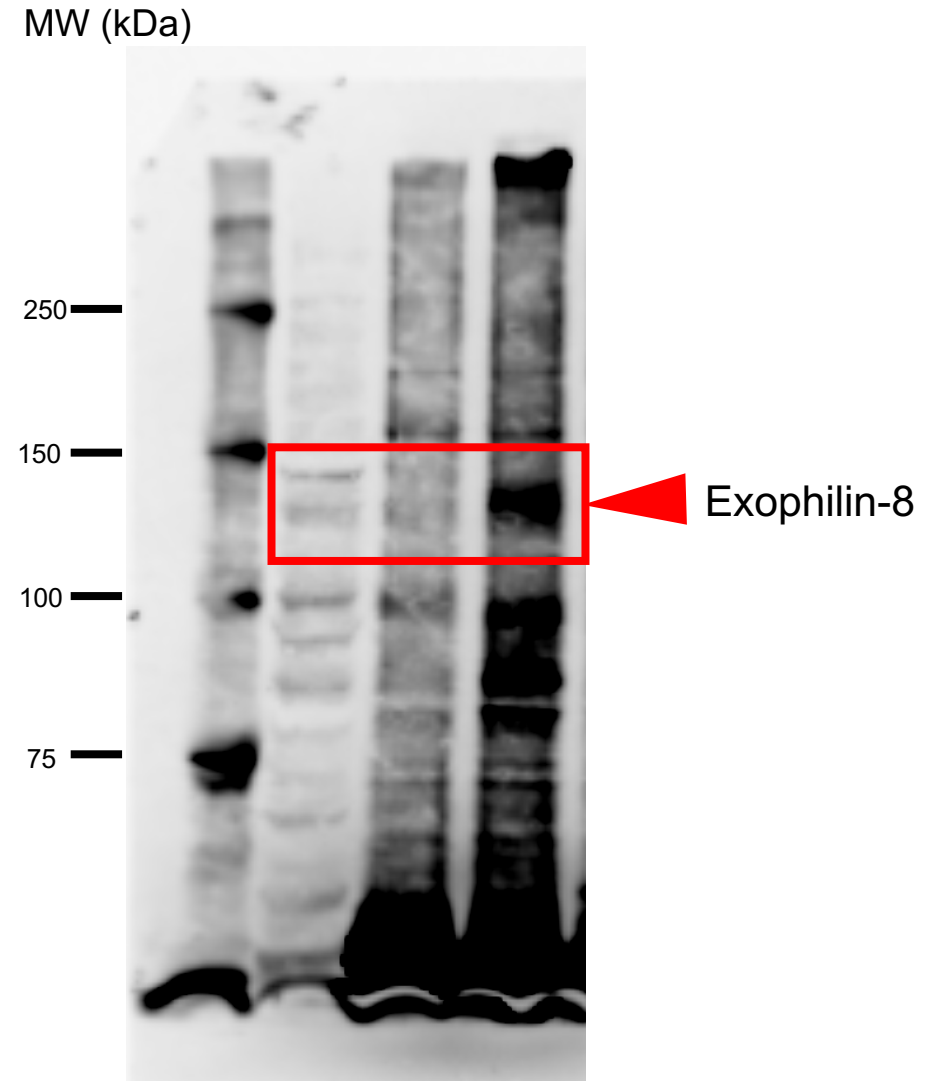

# Source data 2

## Uncropped blot images of Figure 3C

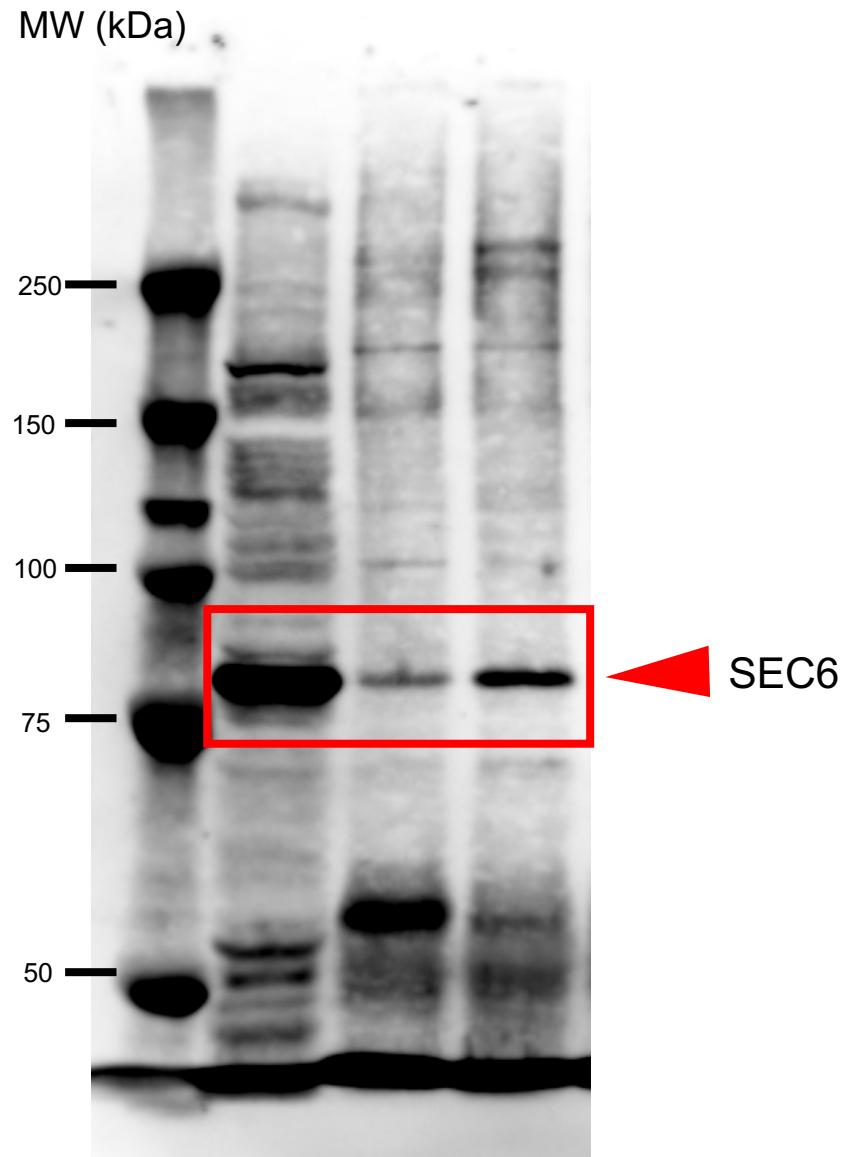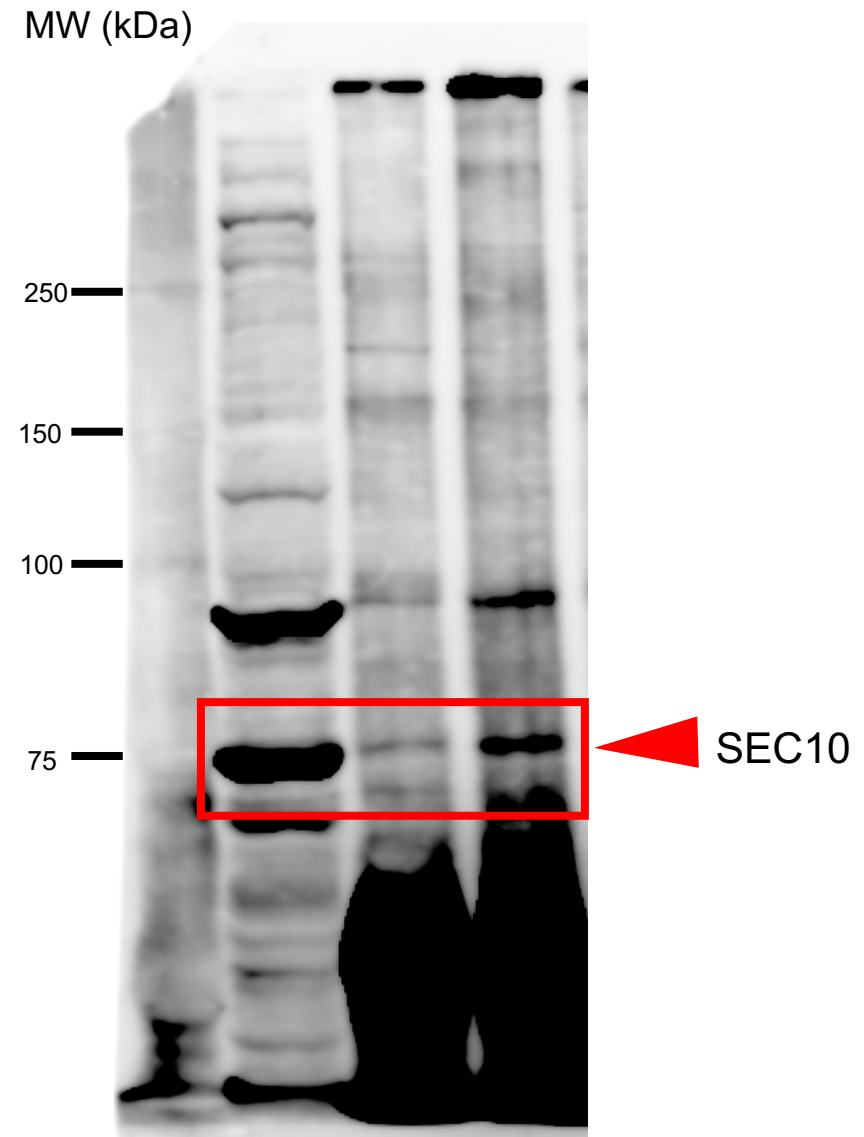



# Source data 2

## Uncropped blot images of Figure 3E

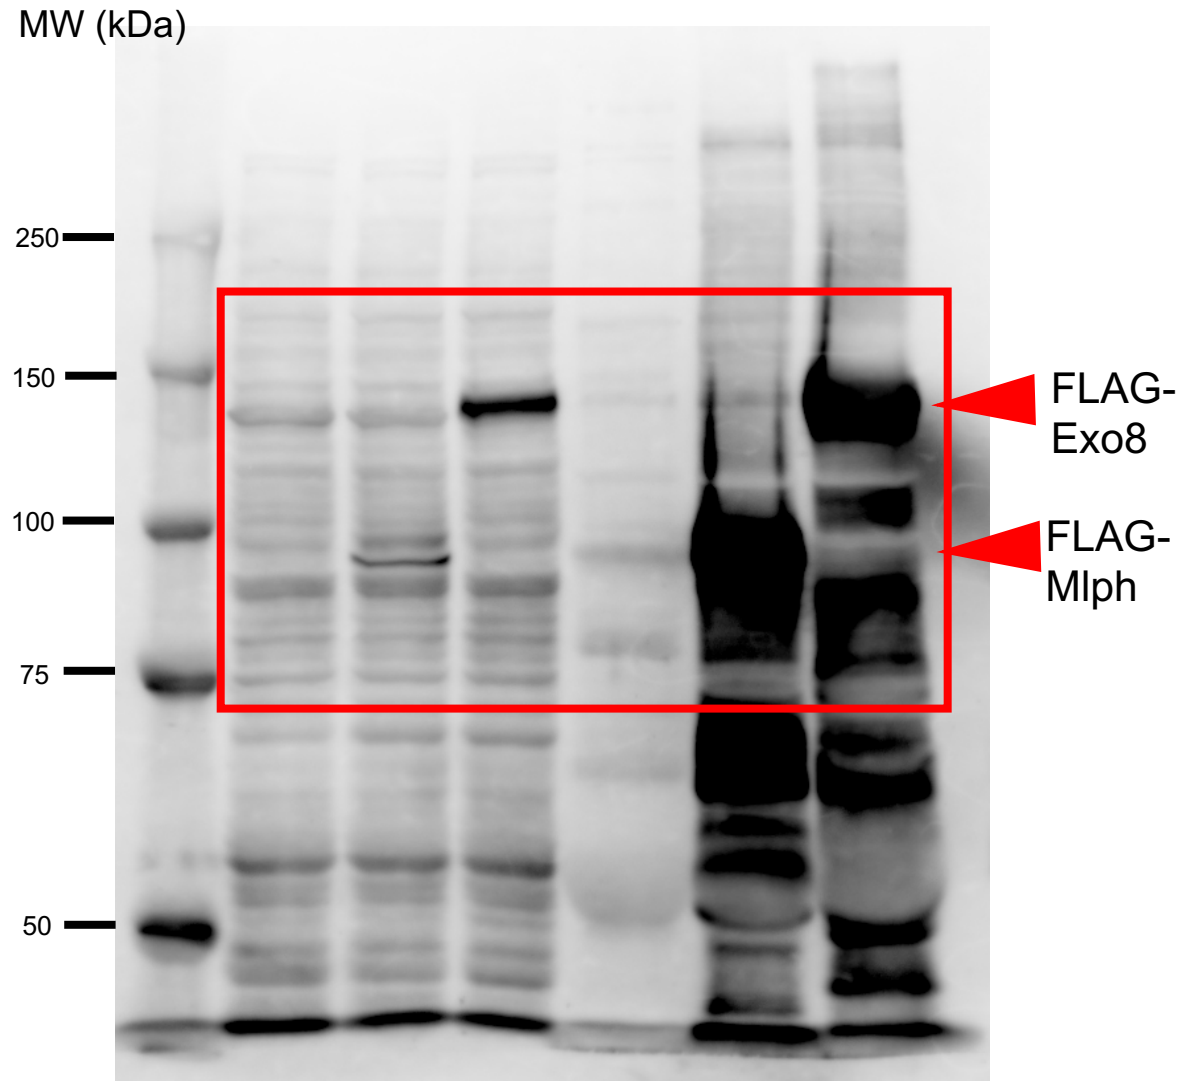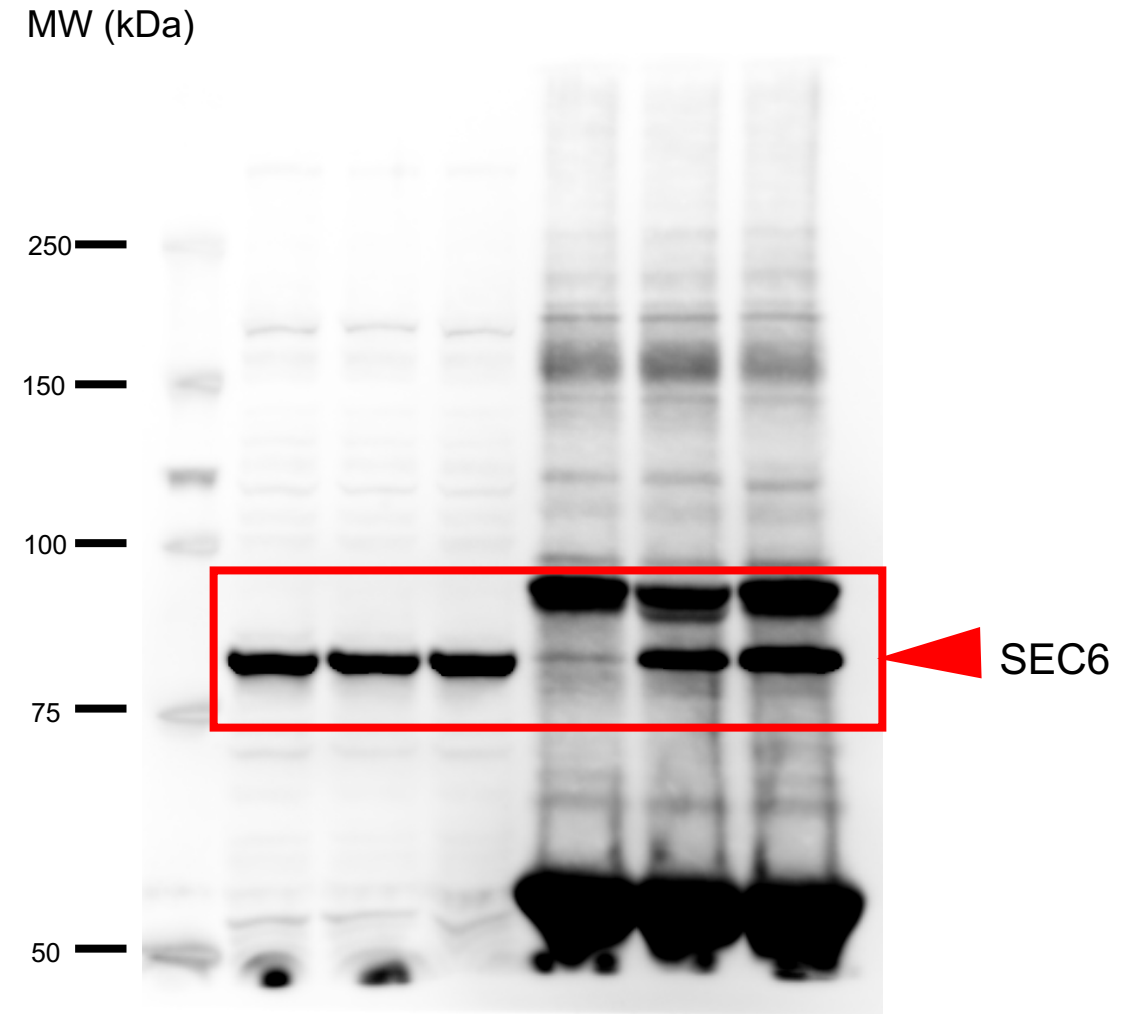

# Source data 2

## Uncropped blot images of Figure 3E

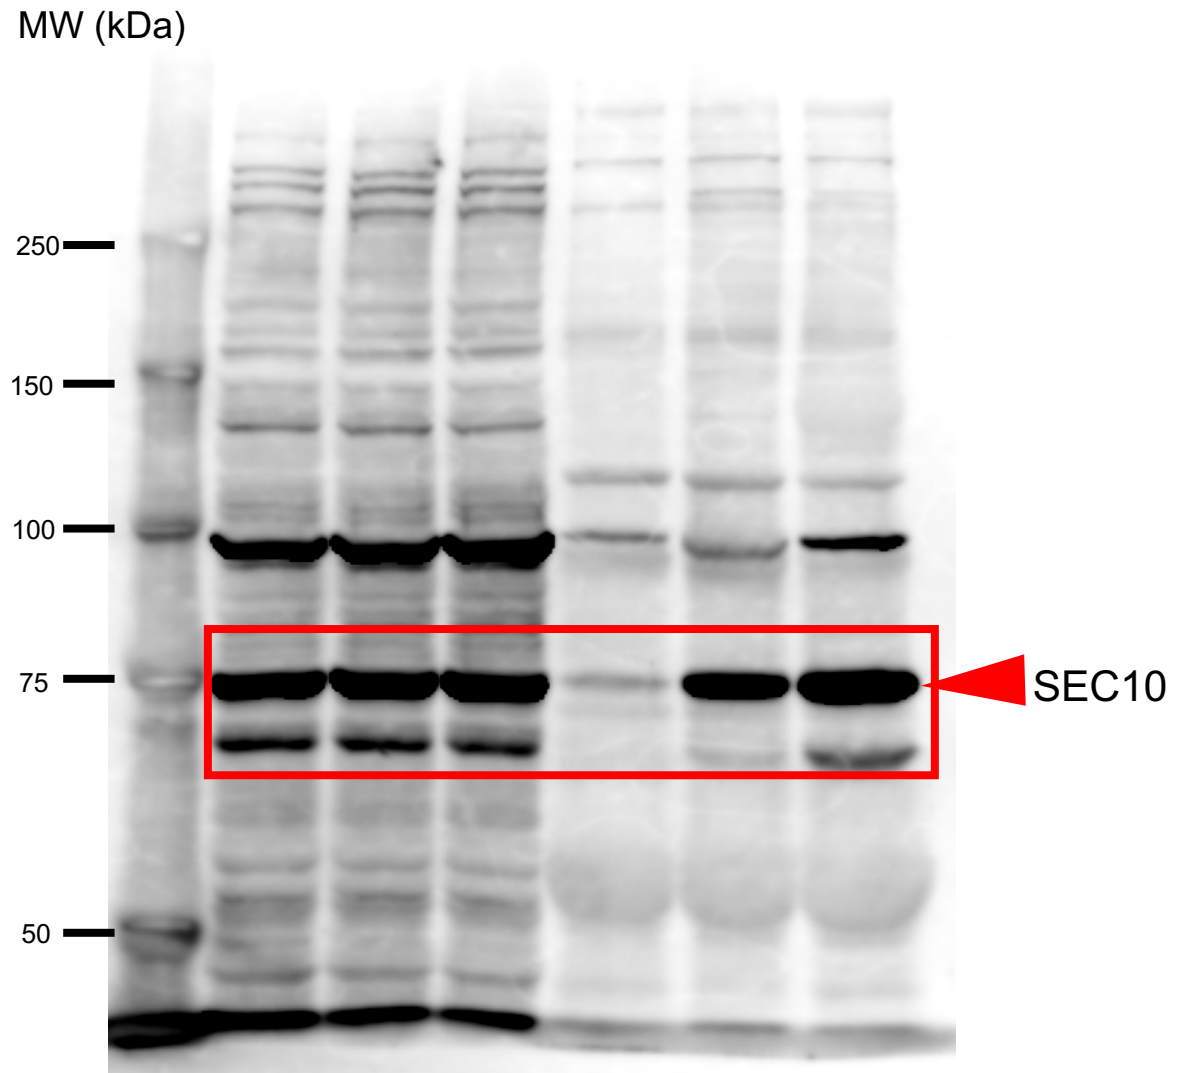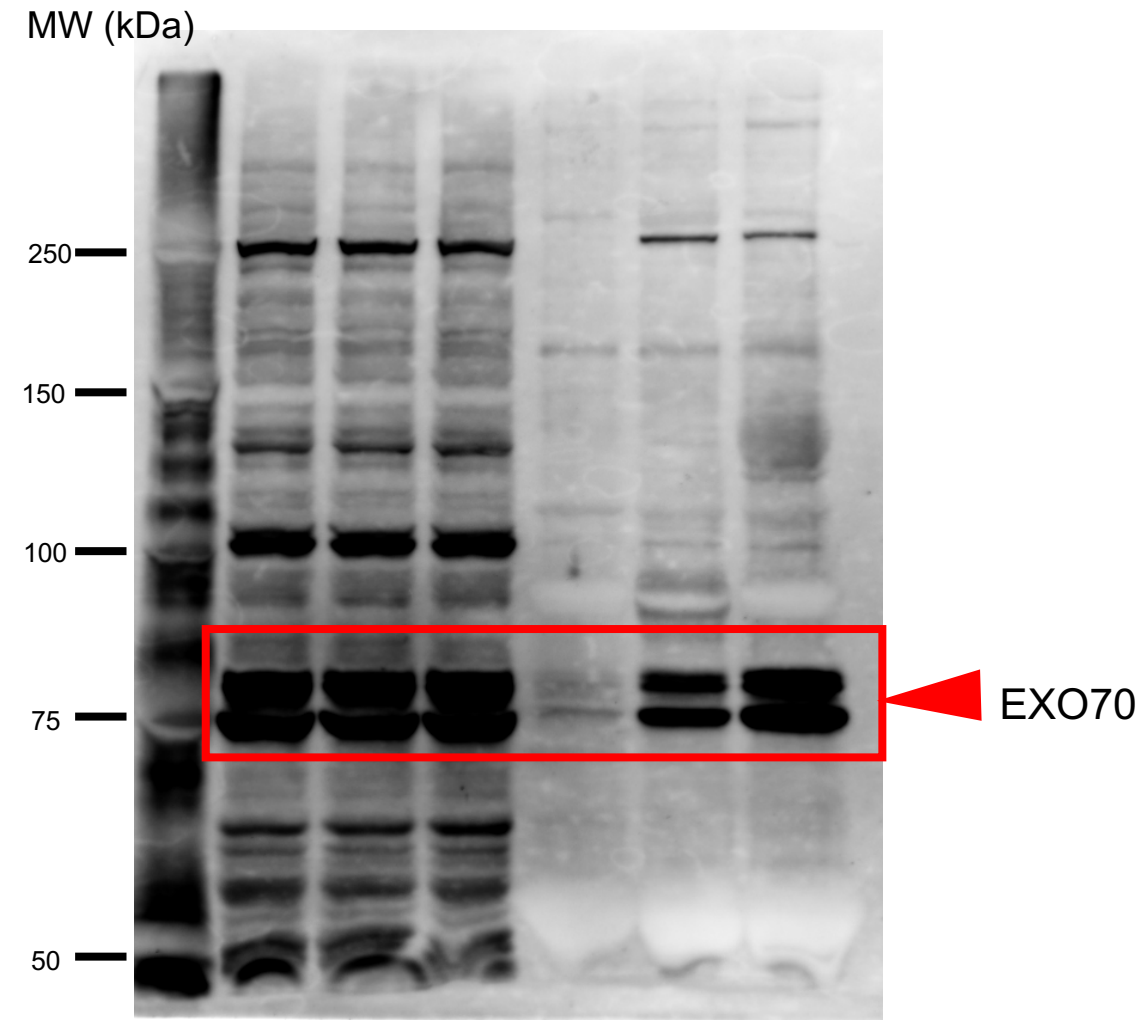

# Source data 2

## Uncropped blot images of Figure 3E

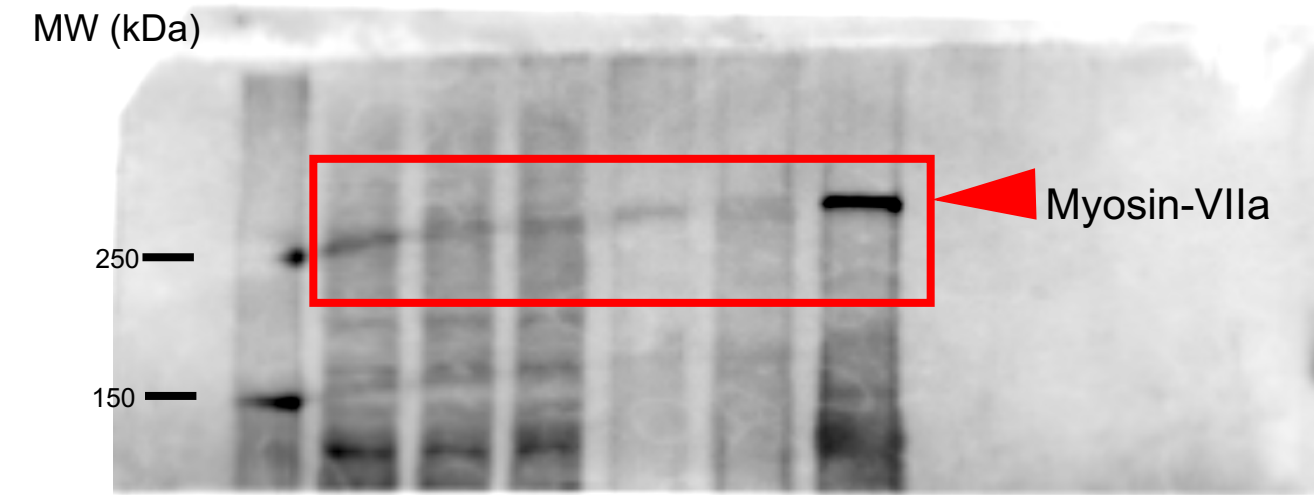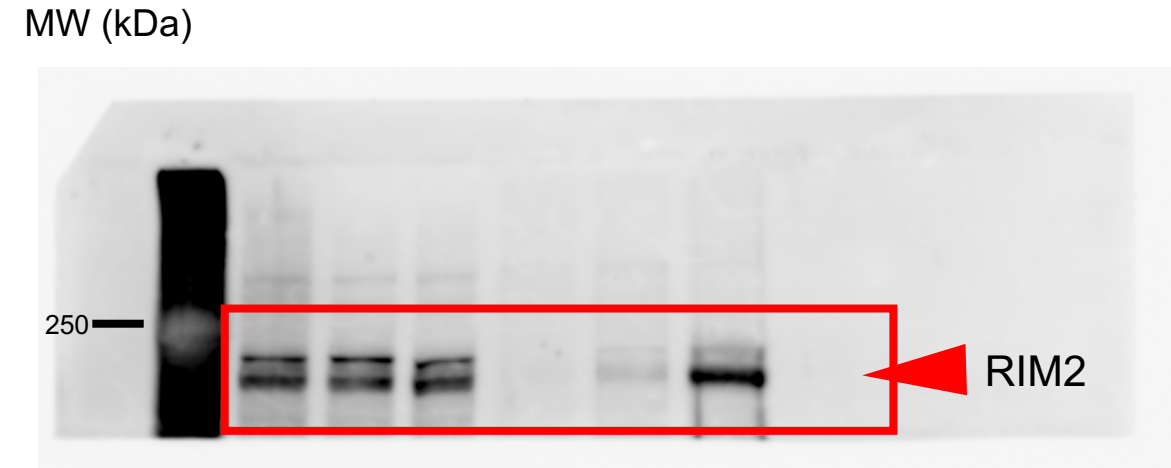

# Source data 2

## Uncropped blot images of Figure 3E

MW (kDa)

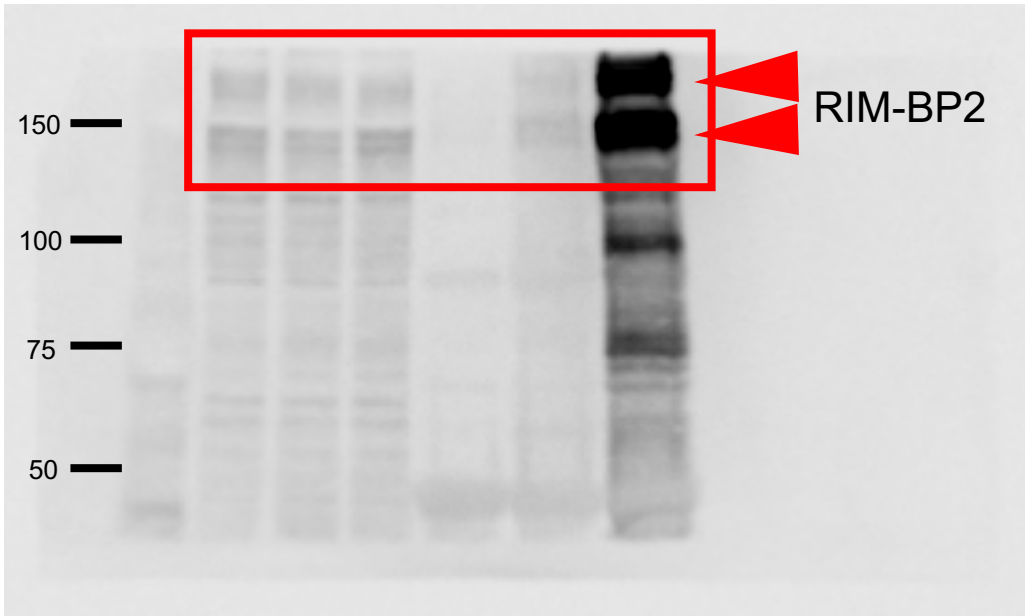

MW (kDa)

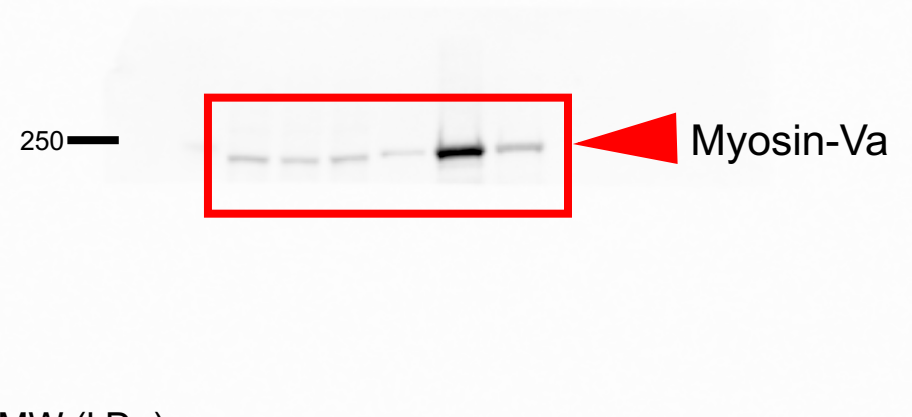

MW (kDa)

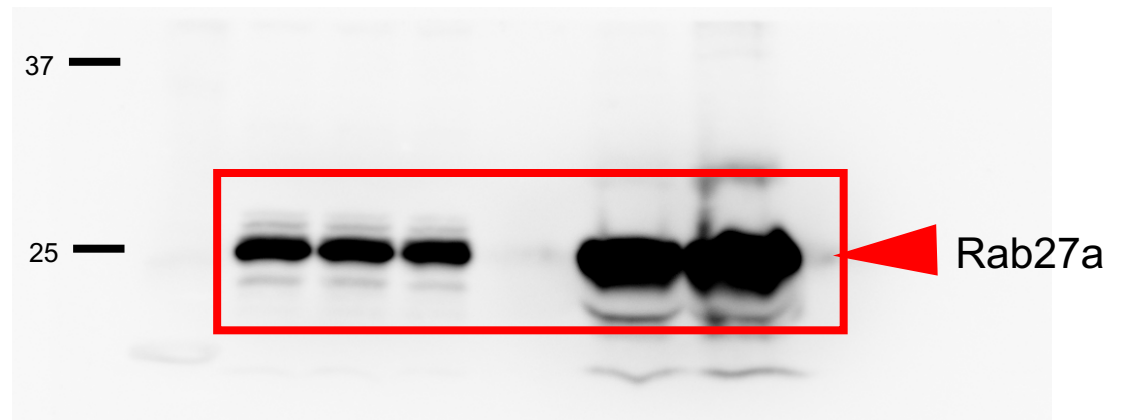

Supplement: fig3-data1 [file Figure 3-source data 2.pdf › Figure 3-source data 2/Figure 3-source data 2.pdf]
