# Supplementary material for: Functional hierarchy among different Rab27 effectors involved in secretory granule exocytosis
Source: eLife journal article supplement (doi:10.7554/elife.82821), 2023-02-21

# Source data 4

## Uncropped blot images of figure supplement 2B

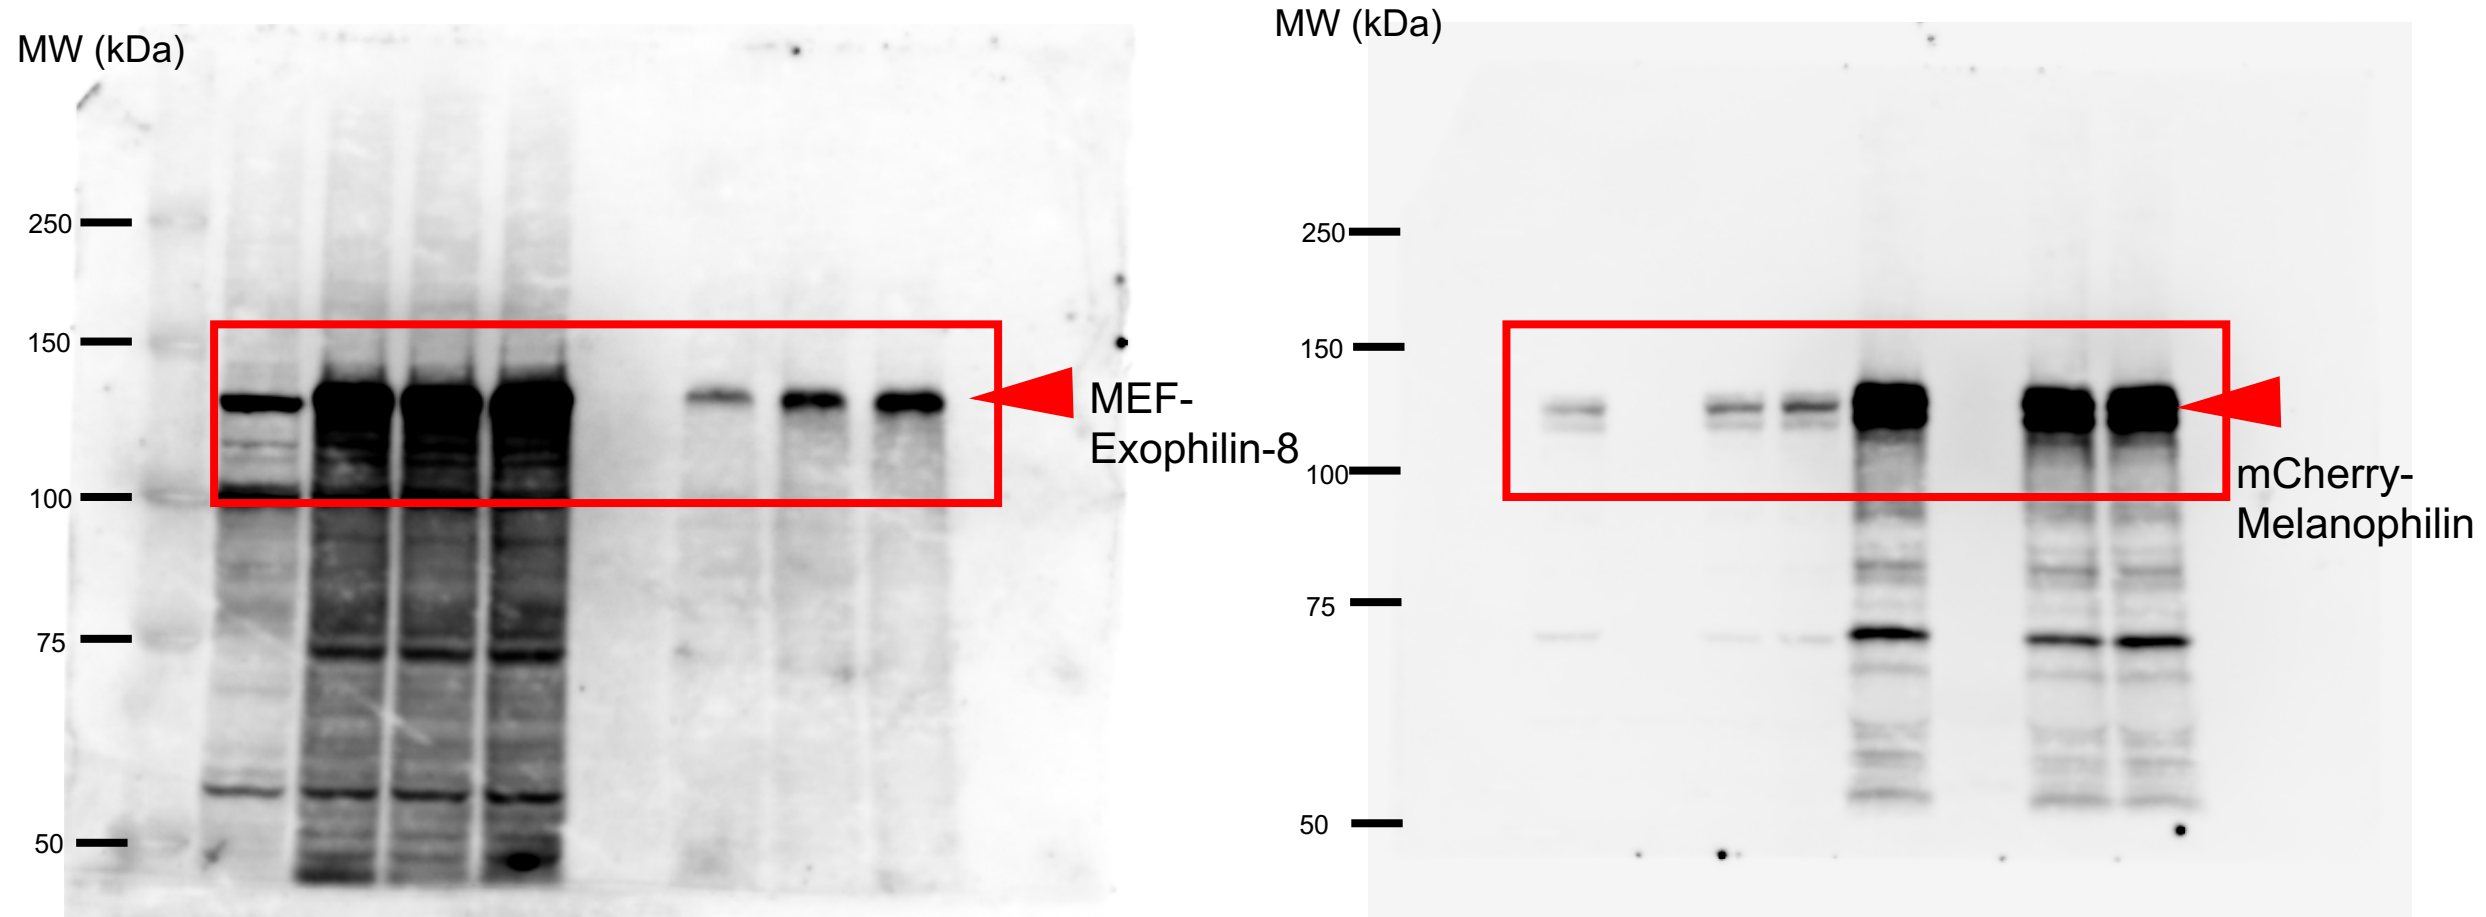

# Source data 4

## Uncropped blot images of figure supplement 2B

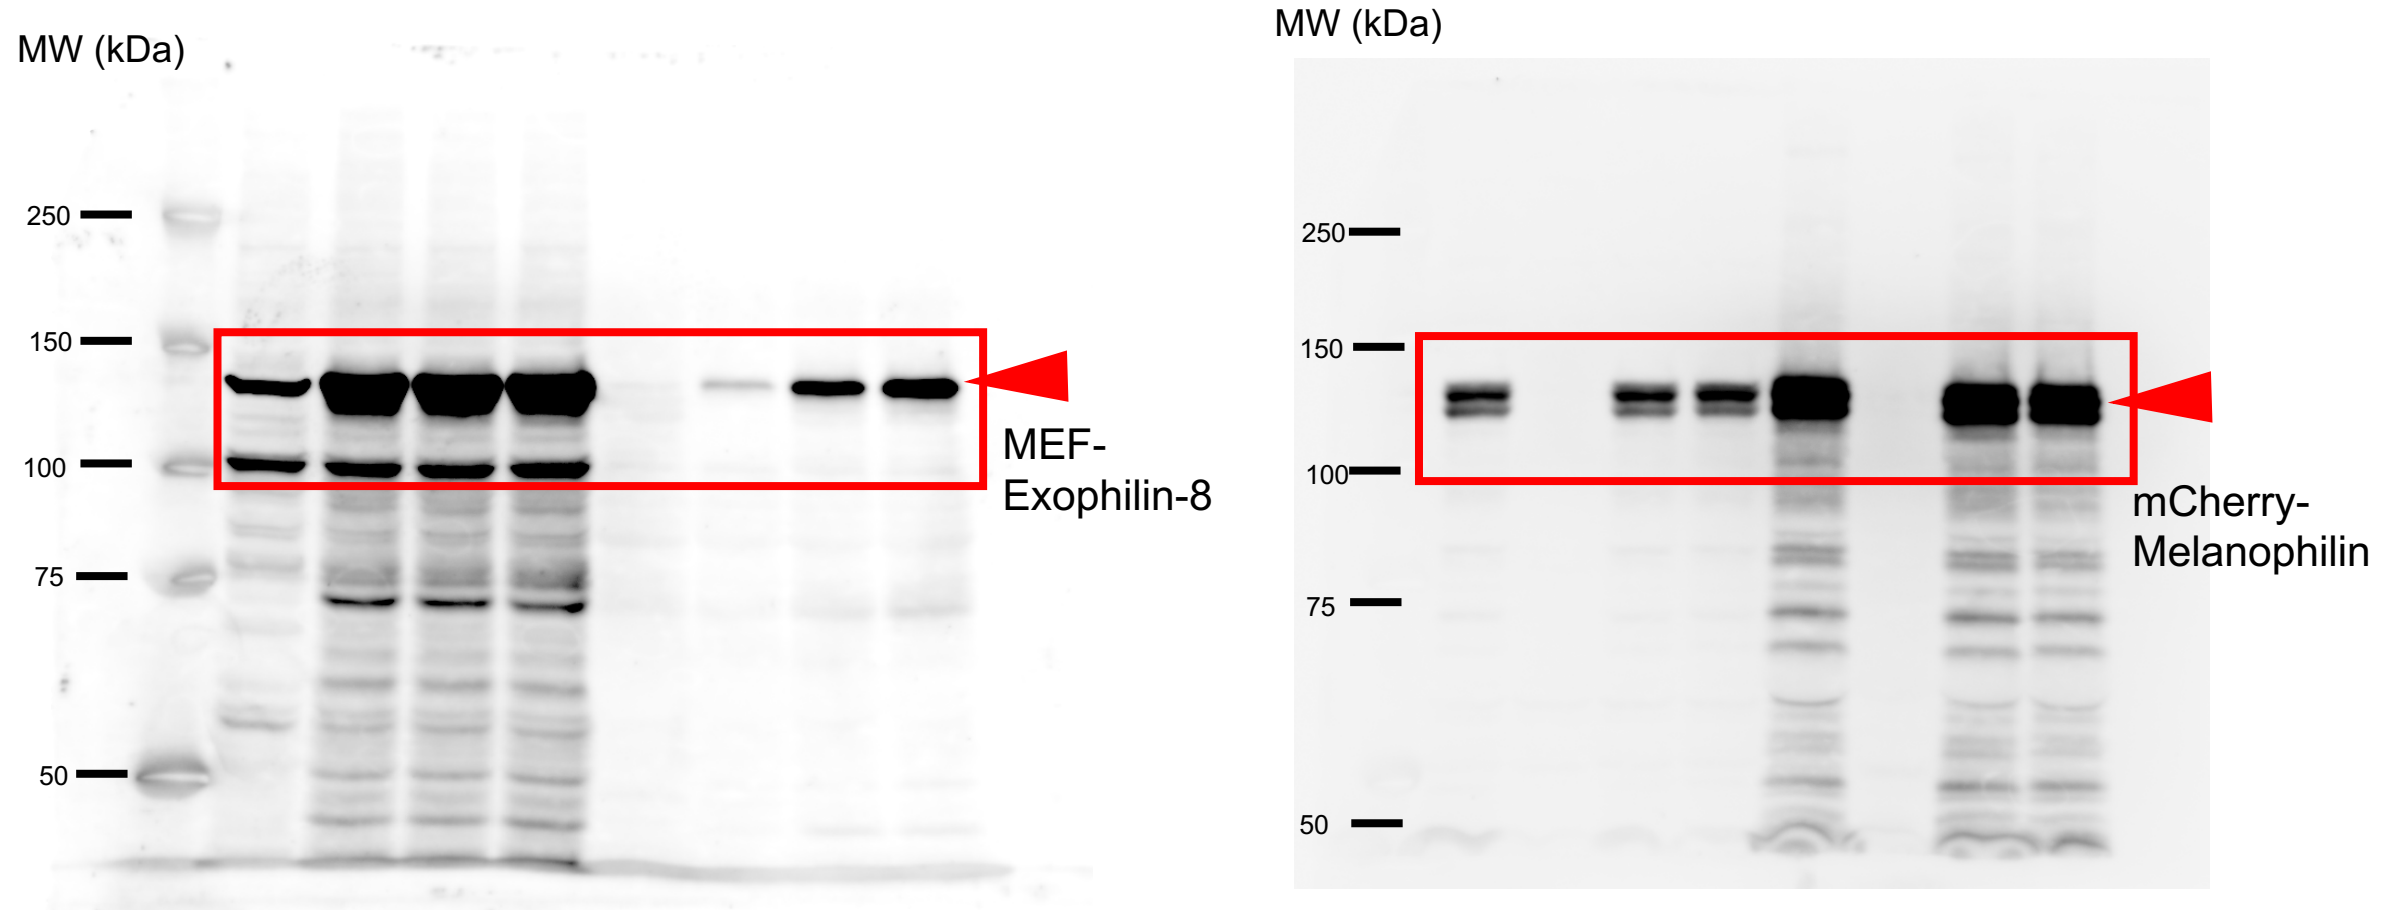

# Source data 4

## Uncropped blot images of figure supplement 2B

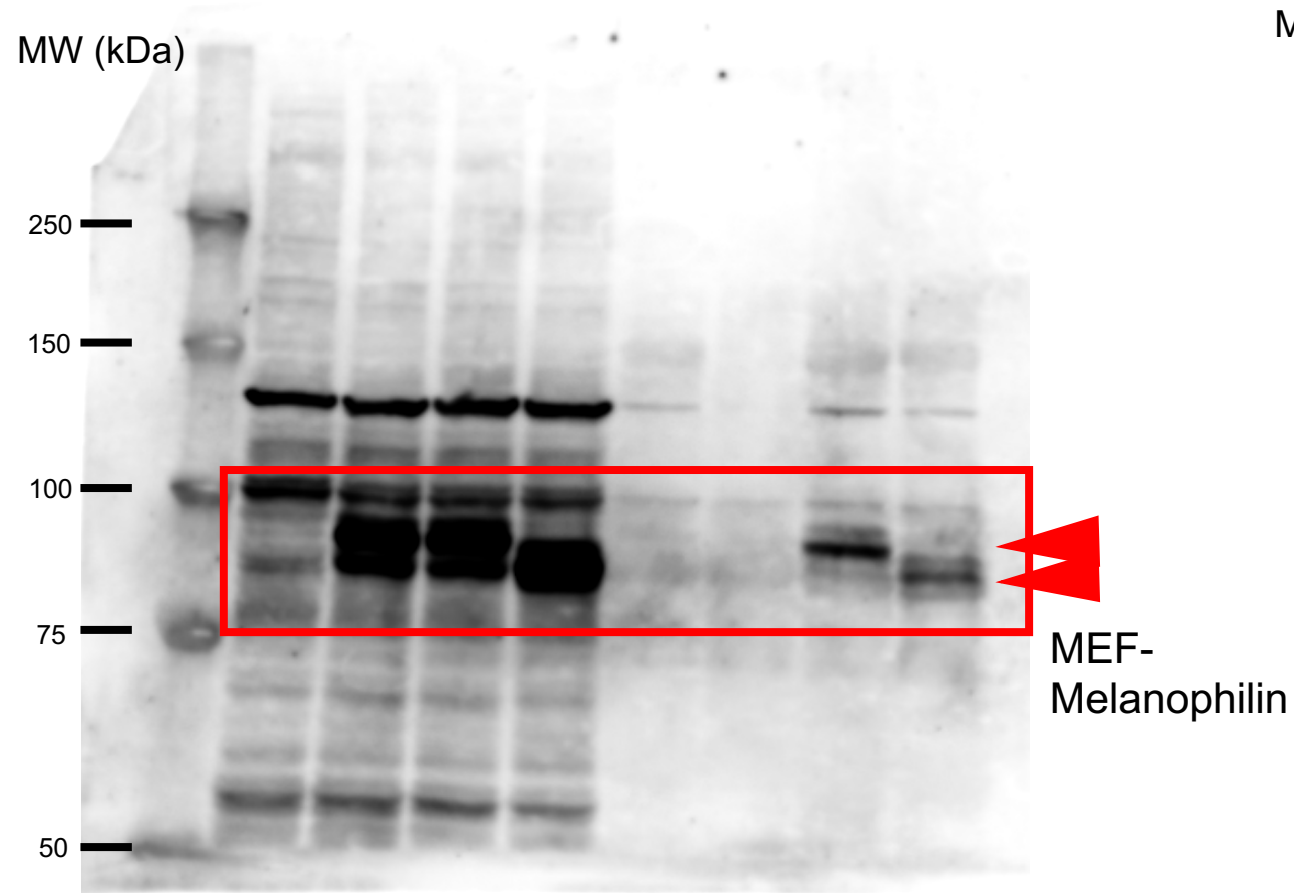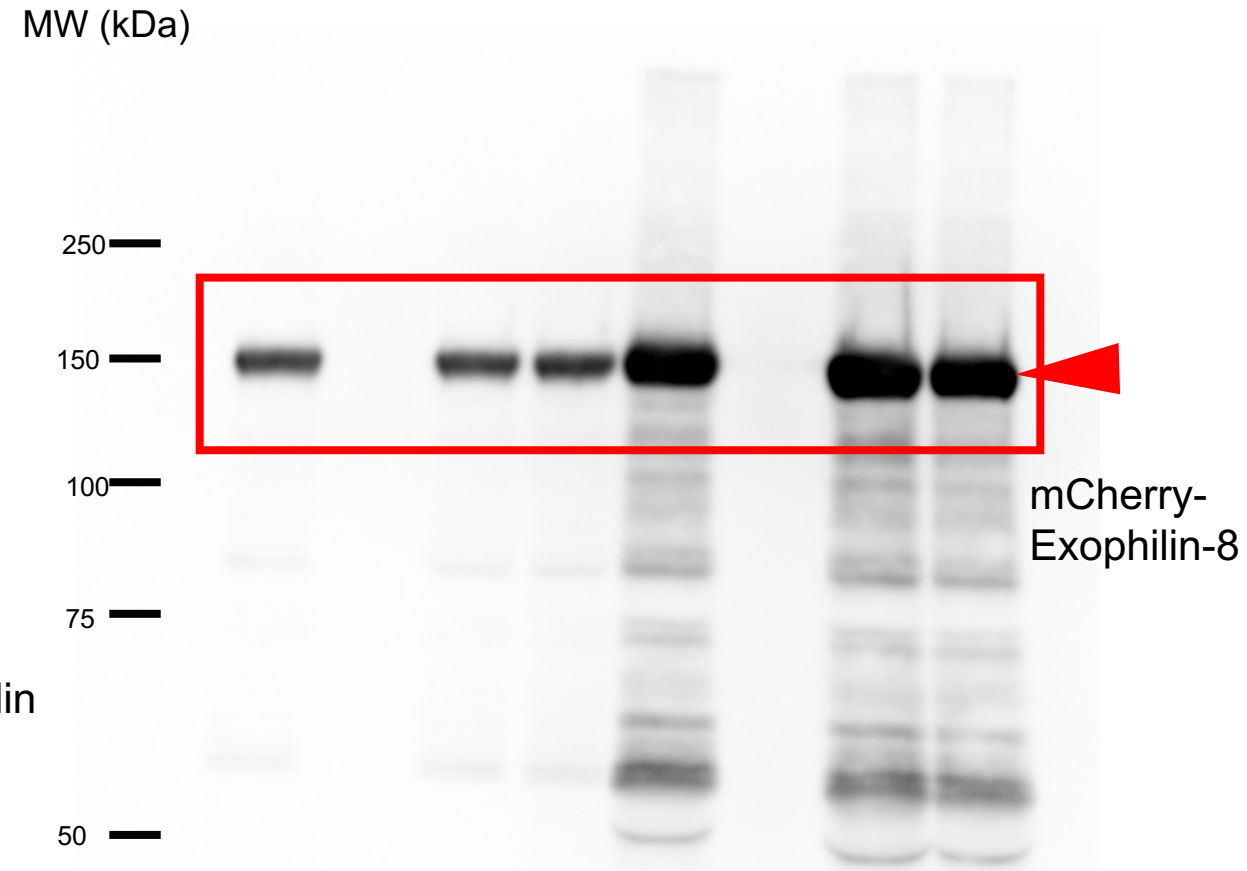

# Source data 4

## Uncropped blot images of figure supplement 2B

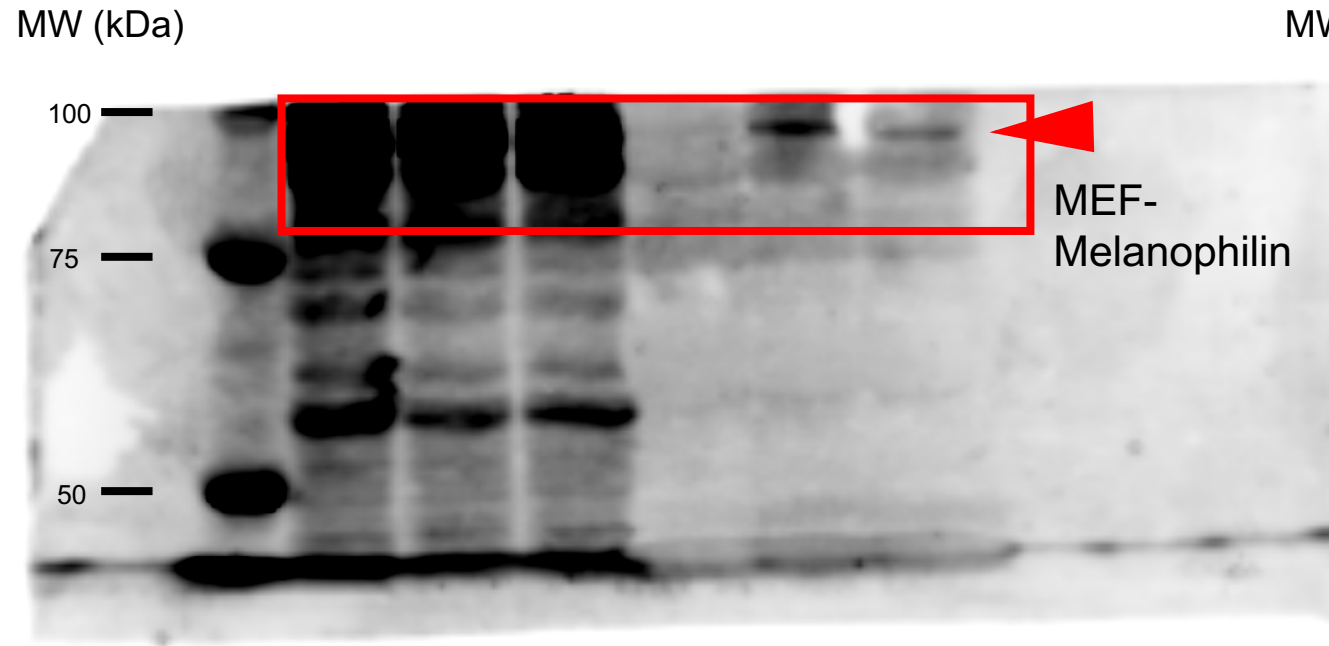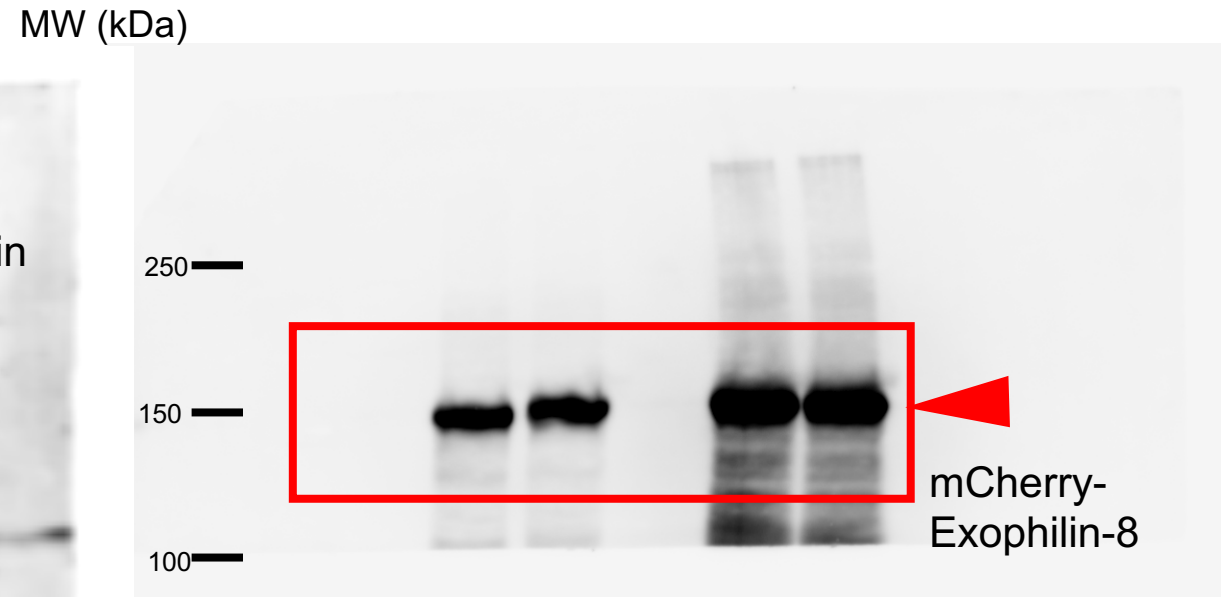

Supplement: fig3-figsupp2-data1 [file elife-82821-fig3-figsupp2-data1-v2.zip]
