# Supplementary figures and images for: Functional hierarchy among different Rab27 effectors involved in secretory granule exocytosis
Source: eLife journal article supplement (doi:10.7554/elife.82821), 2023-02-21

# Source data 1

## Uncropped blot images of Figure 1B

(upper)

MW (kDa)

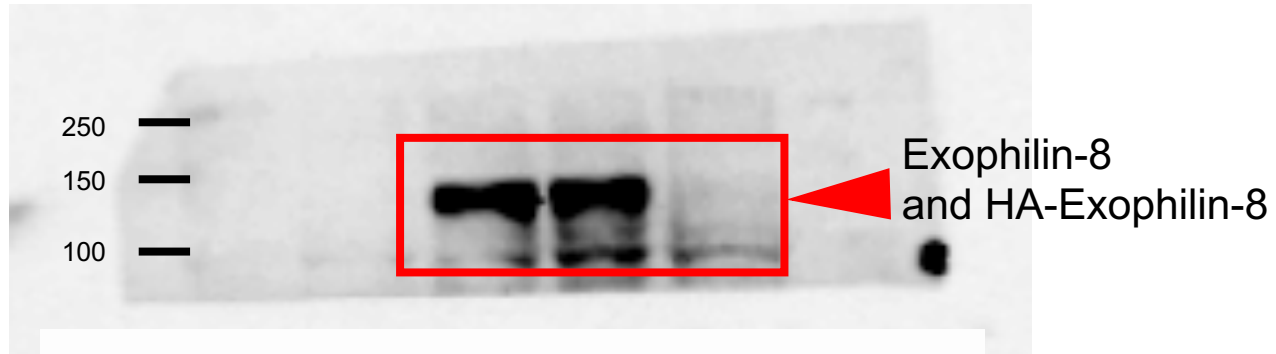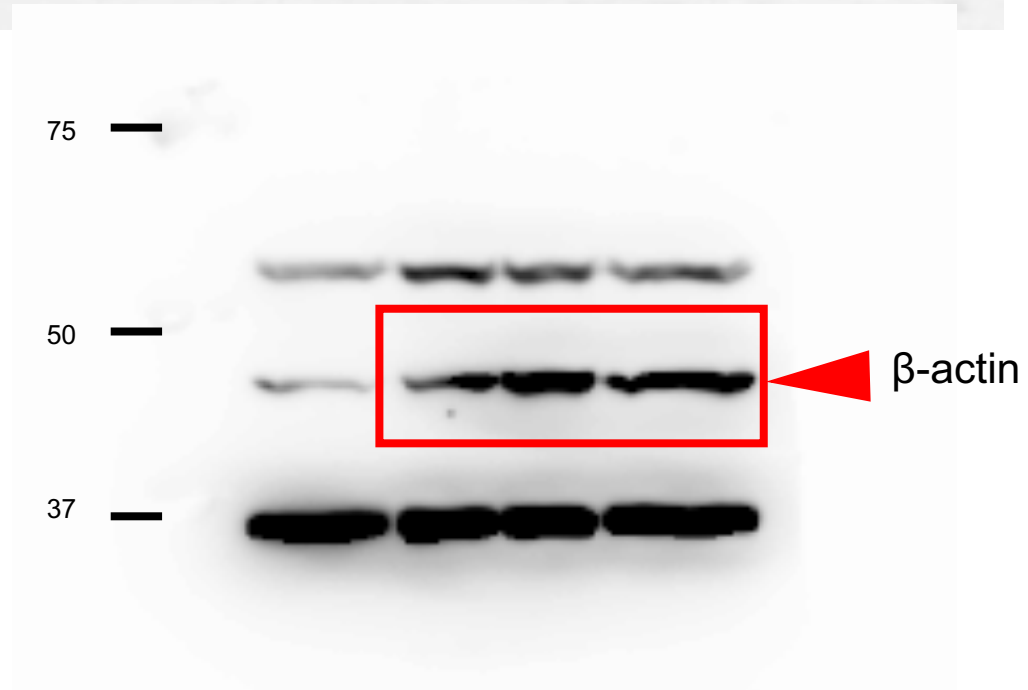

(lower)

MW (kDa)

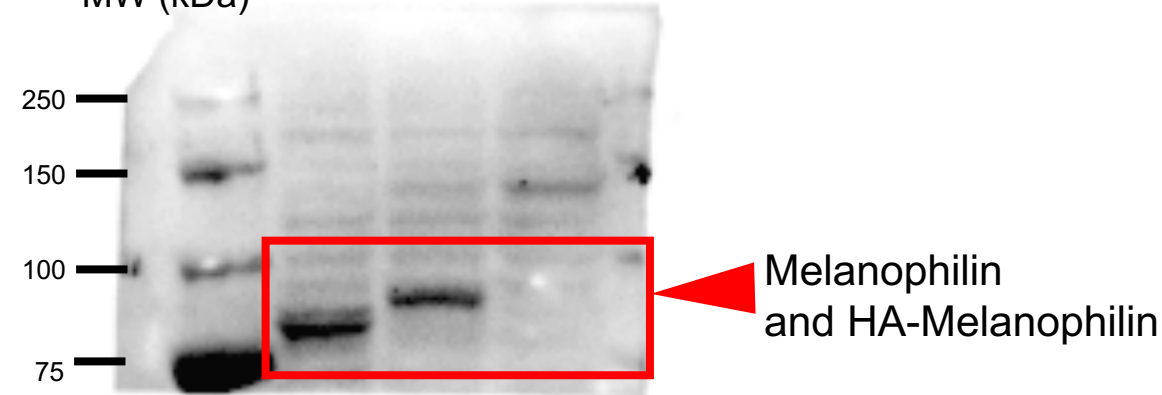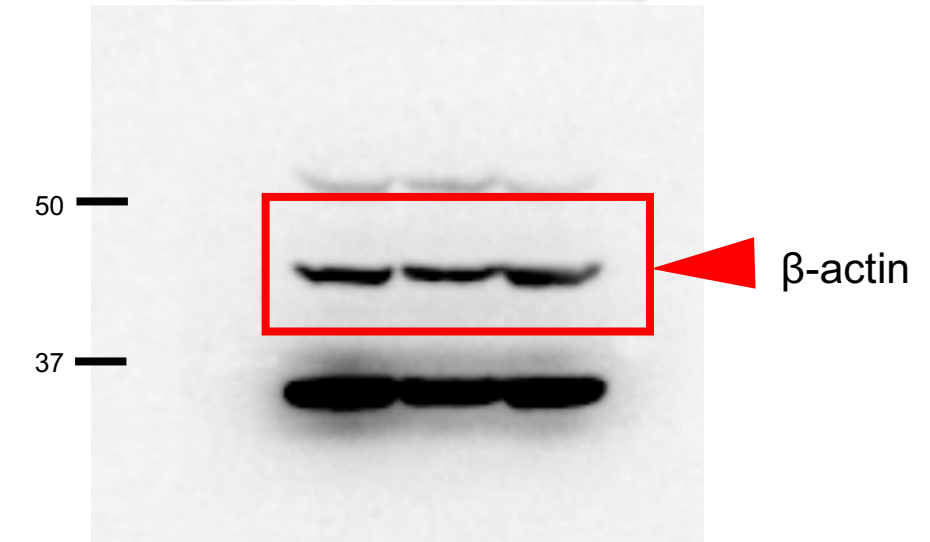

Supplement: fig1-data1 [file Figure 1-Source Data 1.pdf › Figure 1-source data 1/Figure 1-Source Data 1.pdf]

# Source data 3

## Uncropped blot images of figure supplement 1A

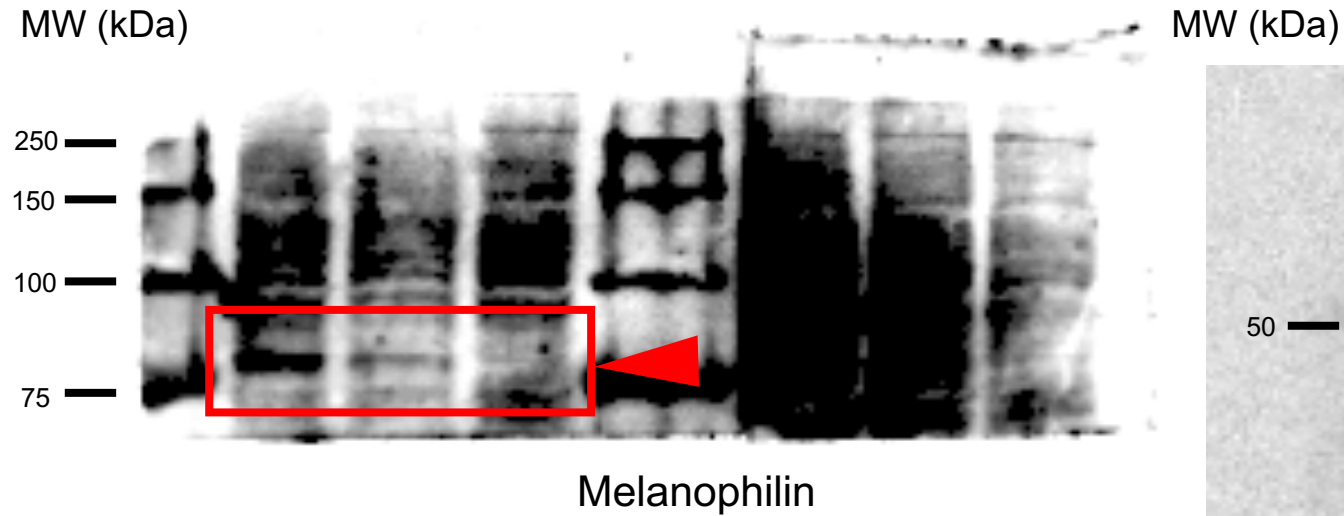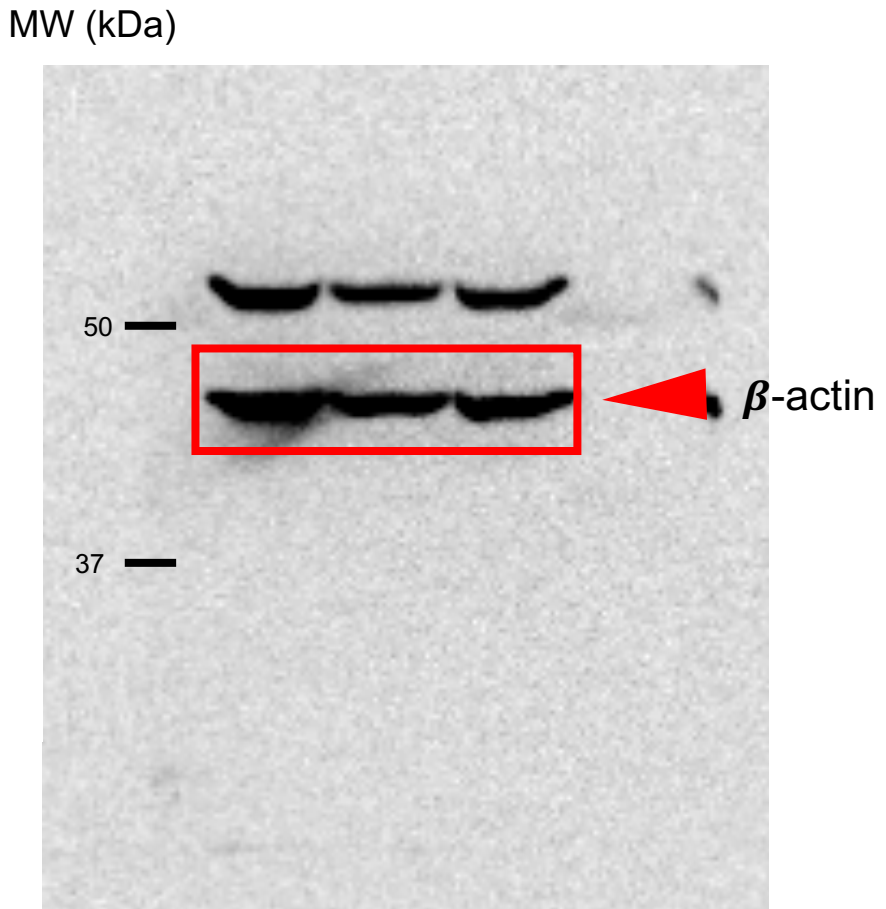

Supplement: fig3-figsupp1-data1 [file elife-82821-fig3-figsupp1-data1-v2.zip]

# Source data 5

## Uncropped blot images of Figure 4B

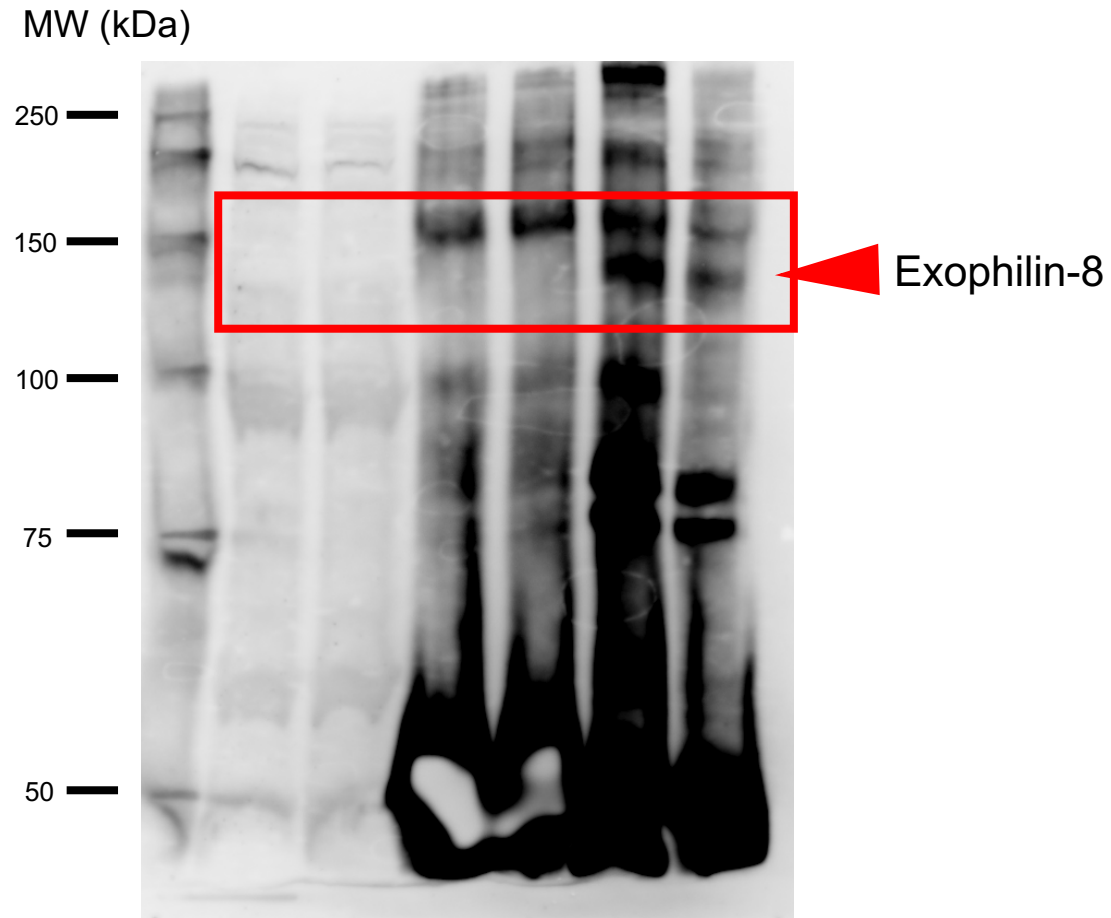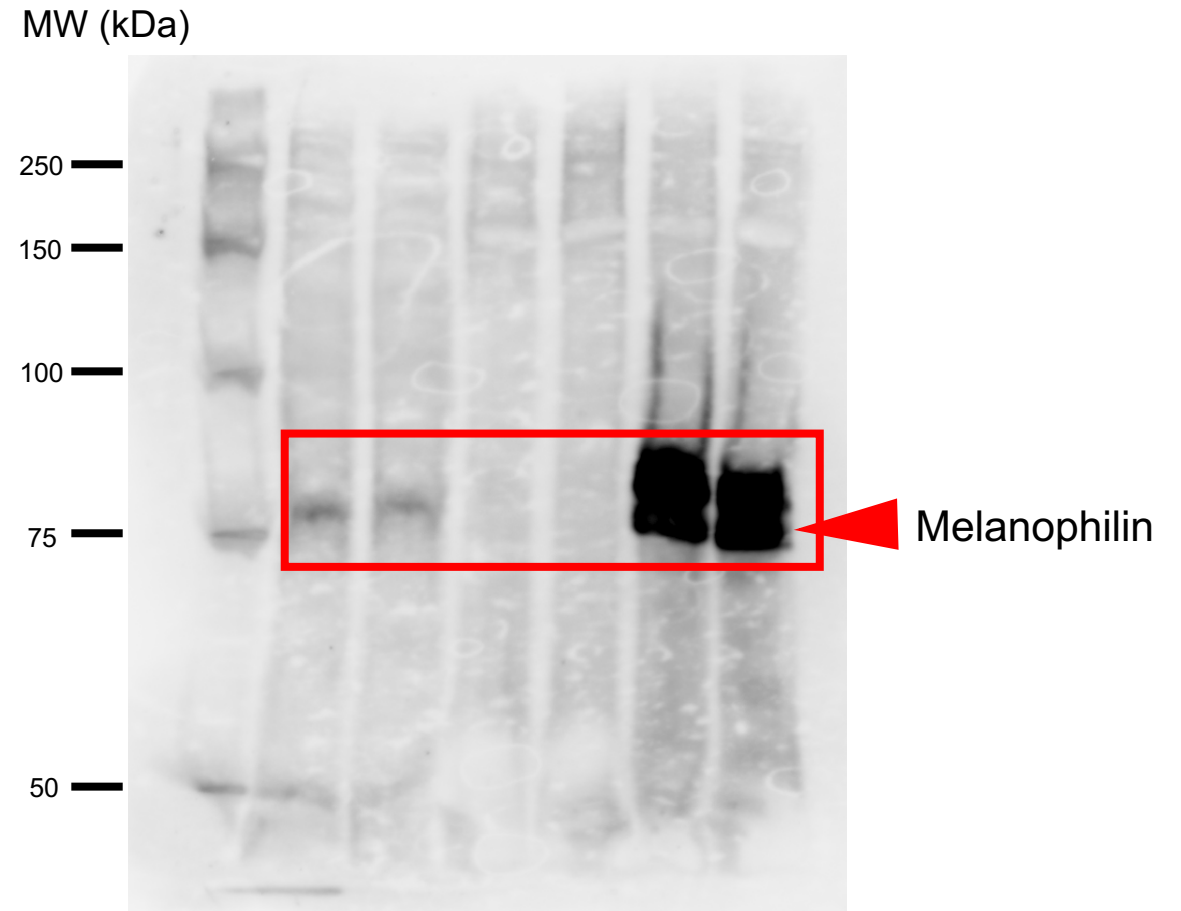

Supplement: fig4-data1 [file elife-82821-fig4-data1-v2.zip]

# Source data 6

## Uncropped blot images of figure supplement 1A

(left)

MW (kDa)

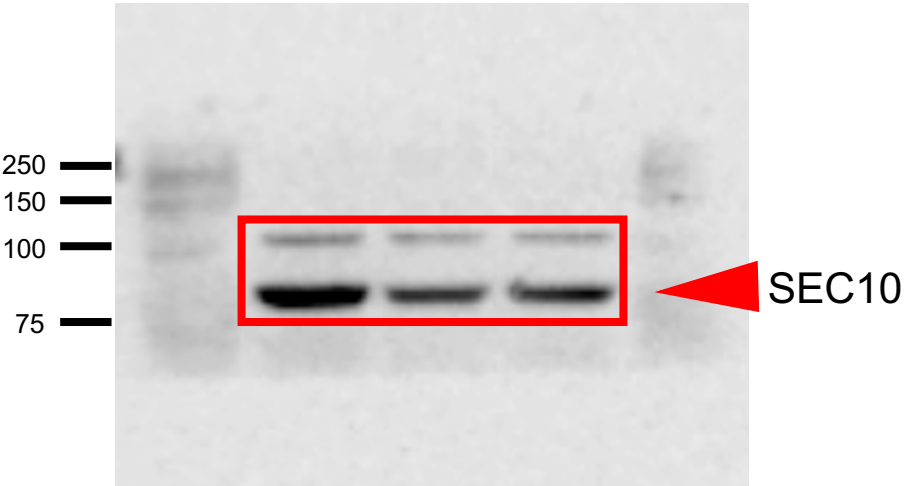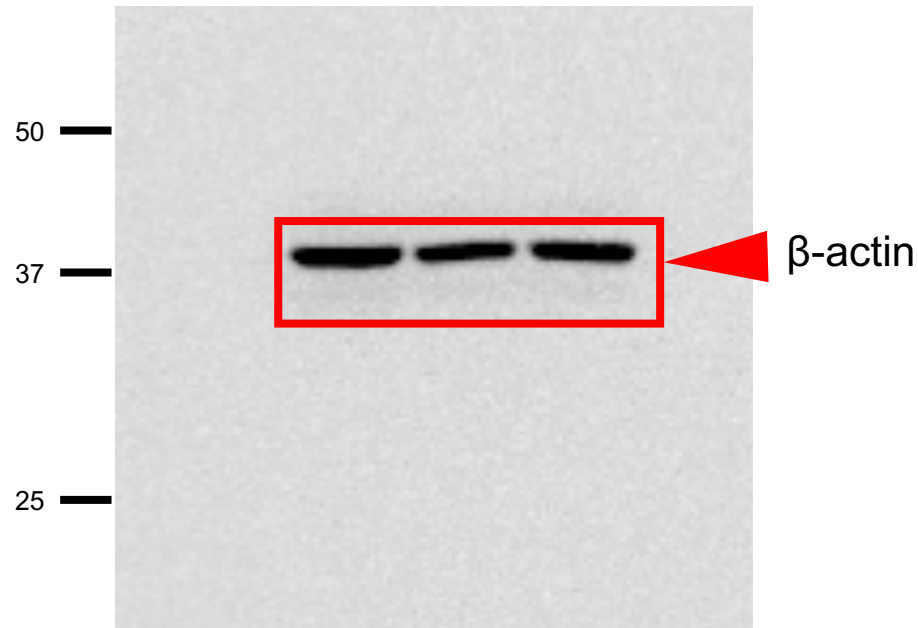

(right)

MW (kDa)

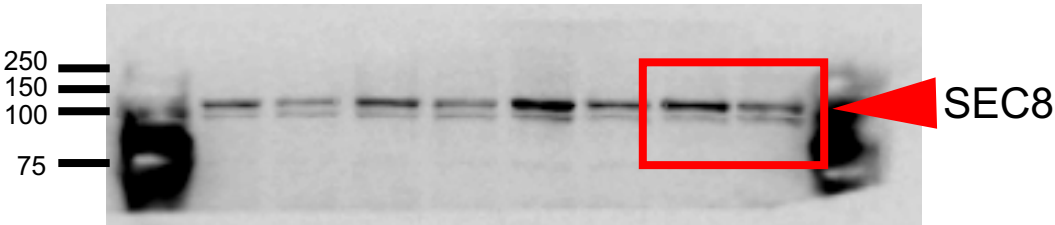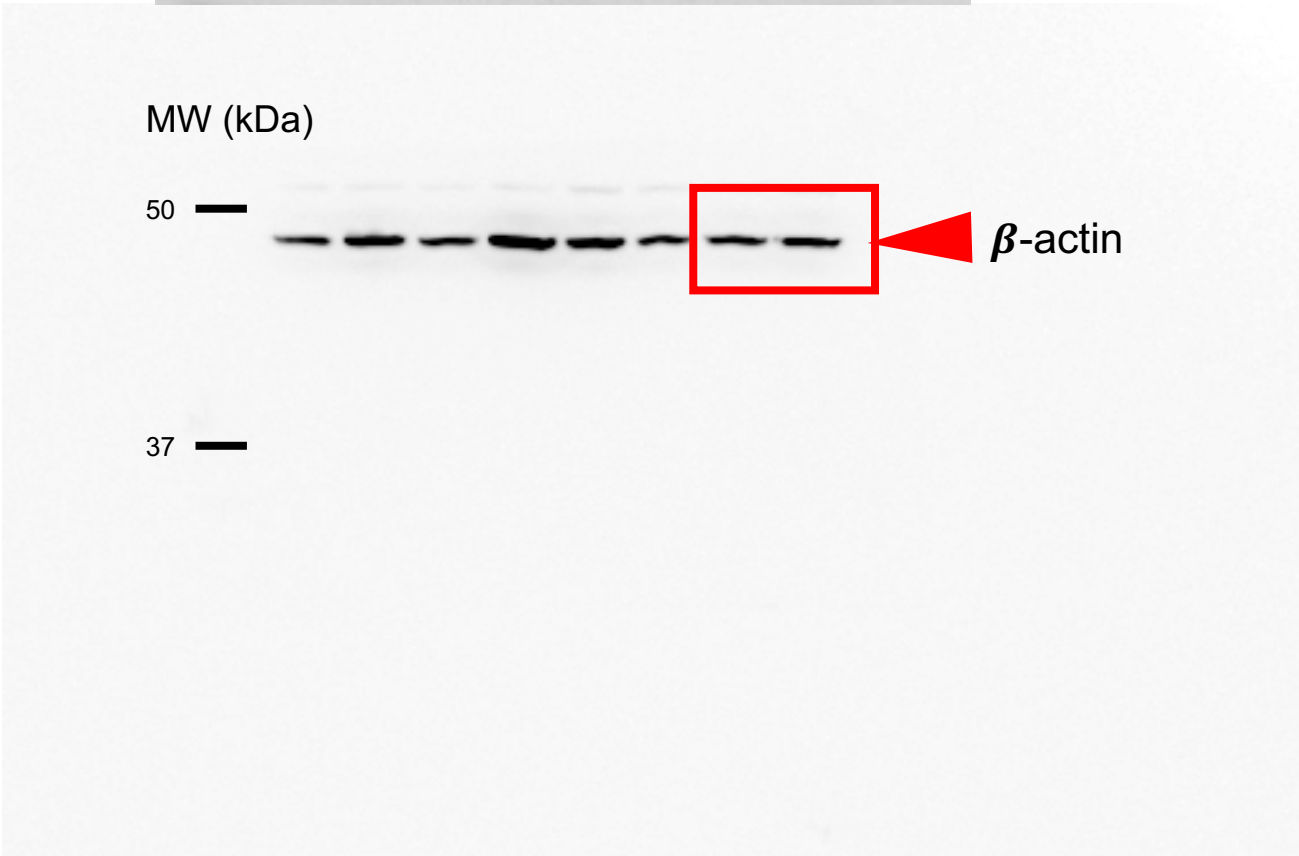

Supplement: fig4-figsupp1-data1 [file elife-82821-fig4-figsupp1-data1-v2.zip]
